# Supplementary material
Source: Frontiers journal article supplement (https://www.frontiersin.org/articles/421827)
Supplement: Table_3.XLSX [file Table_3.XLSX]

## Sheet: T. nucleata
Supplementary Table 3A. Top 500 T. nucleata genes with highest expression levels (calculated using TPM).
Genes mentioned in the manuscript are highlighted.
Transcript_ID	No. of transcripts	Transcript length	TPM (Transcript Per Million)	Annotation	KEGG KO
TRINITY_DN157644_c0_g1_i1	59916	315	12920.9
TRINITY_DN166462_c0_g15_i1	29239.4	551	3604.77
TRINITY_DN160563_c2_g5_i1	19060.4	602	2150.79
TRINITY_DN160563_c2_g6_i1	12001	510	1598.49
TRINITY_DN167552_c0_g3_i1	9770.88	464	1430.46
TRINITY_DN149248_c1_g8_i1	6031.9	294	1393.7
TRINITY_DN171390_c23_g3_i2	8736.83	444	1336.7	[Pfam]Tubulin C-terminal domain
TRINITY_DN161175_c0_g6_i2	6412.49	354	1230.51
TRINITY_DN171602_c8_g12_i4	7741.18	489	1075.37
TRINITY_DN166462_c0_g15_i2	16348.7	1102	1007.78
TRINITY_DN149248_c1_g4_i1	4299.19	320	912.637
TRINITY_DN167552_c0_g7_i1	4867.44	394	839.201
TRINITY_DN171502_c12_g9_i2	8276.77	695	808.98	[Pfam]Tubulin C-terminal domain
TRINITY_DN166470_c0_g1_i4	14181.3	1220	789.617	[Pfam]DEAD/DEAH box helicase	K12614
TRINITY_DN158794_c1_g2_i4	7341.06	642	776.757
TRINITY_DN149248_c1_g6_i2	3239.51	294	748.503
TRINITY_DN158794_c1_g2_i2	7884.25	814	657.957
TRINITY_DN171390_c23_g15_i1	2566.95	276	631.786
TRINITY_DN171880_c2_g4_i1	16896.2	1954	587.391	[Pfam]TerD domain
TRINITY_DN152063_c1_g8_i1	4959.23	653	515.896	[Pfam]Tubulin C-terminal domain
TRINITY_DN140681_c0_g1_i1	17033	2256	512.877	[Pfam]von Willebrand factor type A domain	K08132
TRINITY_DN165095_c0_g6_i2	4005.76	531	512.45
TRINITY_DN171602_c8_g26_i1	2669.92	354	512.338
TRINITY_DN143235_c0_g1_i1	2542.75	338	511.032	[Pfam]Tubulin C-terminal domain
TRINITY_DN172136_c7_g1_i1	25890.8	3650	481.852
TRINITY_DN160110_c0_g1_i1	5533.78	809	464.66
TRINITY_DN171390_c23_g16_i1	2213.48	336	447.505	[Pfam]Tubulin C-terminal domain
TRINITY_DN171390_c23_g5_i1	1942.74	295	447.357
TRINITY_DN172137_c15_g2_i1	7610.34	1239	417.248
TRINITY_DN158212_c2_g1_i5	2623.57	442	403.211	[Pfam]C-terminus of histone H2A
TRINITY_DN171602_c8_g18_i1	1899.4	321	401.951
TRINITY_DN136715_c0_g2_i1	1565.53	265	401.307
TRINITY_DN168665_c1_g7_i2	4154.6	730	386.605
TRINITY_DN161175_c0_g3_i1	1405.81	254	375.971
TRINITY_DN171348_c5_g5_i3	7189.79	1307	373.682	[Pfam]DEAD/DEAH box helicase
TRINITY_DN160563_c2_g5_i3	3368.63	653	350.43
TRINITY_DN171390_c23_g7_i1	1646.63	321	348.46	[Pfam]Tubulin C-terminal domain
TRINITY_DN172114_c13_g21_i3	3424.85	668	348.278
TRINITY_DN171307_c5_g4_i2	1639.72	323	344.849	[Pfam]Tubulin/FtsZ family, GTPase domain
TRINITY_DN158794_c1_g2_i3	2961.82	588	342.171
TRINITY_DN160110_c0_g3_i2	3679.35	736	339.59
TRINITY_DN168665_c1_g11_i1	1420.63	300	321.678
TRINITY_DN171846_c2_g8_i1	1787.59	379	320.398
TRINITY_DN154539_c0_g10_i1	1742.29	376	314.771
TRINITY_DN168665_c1_g7_i3	2250.81	492	310.767
TRINITY_DN144591_c0_g1_i1	1714.15	376	309.687
TRINITY_DN171960_c10_g2_i1	7054.12	1552	308.754	[Pfam]Hsp90 protein
TRINITY_DN158794_c1_g2_i1	3224.27	719	304.624
TRINITY_DN171307_c5_g16_i4	1750.5	392	303.345	[Pfam]Tubulin C-terminal domain
TRINITY_DN172137_c15_g5_i3	3466.16	777	303.032
TRINITY_DN167402_c0_g6_i3	2206.06	506	296.161
TRINITY_DN160536_c0_g1_i1	13396	3254	279.653	[Pfam]Hsp90 protein	K09487
TRINITY_DN162109_c4_g2_i5	5175.73	1267	277.496	[Pfam]Tubulin/FtsZ family, GTPase domain	K07375
TRINITY_DN171846_c3_g20_i2	1796.88	441	276.785
TRINITY_DN151604_c3_g12_i1	2216.1	554	271.732
TRINITY_DN172091_c9_g1_i13	4968.95	1272	265.362	[Tigrfam]ATPase-IIC_X-K: Na,H/K antiporter P-type ATPase, alpha subunit	K01539
TRINITY_DN164532_c1_g3_i1	4849.45	1242	265.236	[Pfam]Hint module
TRINITY_DN172061_c6_g9_i2	3735.25	959	264.583	[Pfam]Glutamate/Leucine/Phenylalanine/Valine dehydrogenase
TRINITY_DN172040_c11_g9_i2	2381.64	613	263.923	[Tigrfam]prok_dnaK: chaperone protein DnaK
TRINITY_DN172079_c7_g7_i1	6819.09	1759	263.343
TRINITY_DN171979_c4_g14_i2	1660.39	432	261.089
TRINITY_DN172114_c13_g12_i2	3341.62	870	260.915
TRINITY_DN151604_c3_g8_i3	1870.58	488	260.386
TRINITY_DN143235_c0_g7_i1	1143.03	303	256.257	[Pfam]Tubulin C-terminal domain
TRINITY_DN164964_c0_g17_i1	2707.64	721	255.104
TRINITY_DN171602_c8_g3_i5	1696.81	453	254.446
TRINITY_DN172097_c7_g6_i1	6120.93	1696	245.162	[Pfam]HEAT repeats	K17263
TRINITY_DN171785_c5_g11_i2	2111.35	586	244.751
TRINITY_DN140181_c0_g1_i1	2588.21	719	244.53	[Pfam]EF-hand domain pair
TRINITY_DN171307_c5_g17_i1	1181.39	330	243.187	[Pfam]Tubulin/FtsZ family, GTPase domain
TRINITY_DN172141_c22_g2_i1	11337.5	3230	238.438
TRINITY_DN171860_c7_g11_i4	4683.4	1349	235.836
TRINITY_DN161609_c0_g1_i3	3728.12	1075	235.582	[Tigrfam]sucCoAalpha: succinate-CoA ligase, alpha subunit	K01899
TRINITY_DN172094_c6_g1_i1	17444	5101	232.301	[Pfam]Copper/zinc superoxide dismutase (SODC)
TRINITY_DN171210_c9_g6_i2	1717.57	503	231.957	[Pfam]Hsp90 protein
TRINITY_DN146090_c0_g1_i1	3129.59	927	229.334	[Pfam]UBA-like domain
TRINITY_DN166651_c1_g1_i1	6522.96	1937	228.758	[Pfam]Lectin C-type domain
TRINITY_DN147682_c4_g10_i1	996.87	297	228.005
TRINITY_DN145068_c0_g1_i1	6277.56	1881	226.706	[Tigrfam]ahcY: adenosylhomocysteinase	K01251
TRINITY_DN168665_c1_g4_i1	1163.19	349	226.405
TRINITY_DN166166_c0_g4_i2	1349.43	405	226.338
TRINITY_DN132445_c0_g1_i1	7037	2147	222.647	[Pfam]FAD binding domain
TRINITY_DN171602_c8_g26_i2	1443.62	444	220.867
TRINITY_DN171210_c9_g2_i3	1575.01	491	217.903	[Pfam]Hsp90 protein
TRINITY_DN168709_c15_g4_i2	1224.25	386	215.449	[Pfam]Tubulin C-terminal domain
TRINITY_DN169956_c15_g3_i1	1226.23	389	214.133	[Pfam]Tubulin C-terminal domain
TRINITY_DN171602_c8_g12_i1	816.14	260	213.232
TRINITY_DN171960_c10_g4_i4	1290.62	414	211.768	[Pfam]Hsp90 protein
TRINITY_DN165095_c0_g7_i2	1512.69	486	211.434
TRINITY_DN161175_c0_g6_i1	786.3	254	210.289
TRINITY_DN171579_c15_g14_i1	1327.35	431	209.204	[Pfam]Tubulin C-terminal domain
TRINITY_DN172103_c7_g5_i2	2201.72	717	208.595	[Pfam]DEAD/DEAH box helicase
TRINITY_DN171699_c5_g7_i1	2315.07	770	204.237
TRINITY_DN172068_c8_g9_i1	2069.14	693	202.823	[Pfam]PT repeat
TRINITY_DN143103_c0_g2_i1	1430.55	481	202.032
TRINITY_DN171746_c6_g19_i2	1284.8	434	201.098	[Pfam]ATP:guanido phosphotransferase, C-terminal catalytic domain
TRINITY_DN166633_c1_g3_i2	2268.5	774	199.095	[Pfam]Sulfatase
TRINITY_DN171846_c2_g1_i1	1300.7	452	195.479
TRINITY_DN151559_c0_g2_i2	1223.93	430	193.352	[Pfam]Tubulin C-terminal domain
TRINITY_DN169683_c3_g5_i2	1353.84	489	188.07	[Pfam]Annexin
TRINITY_DN172137_c15_g3_i3	3426.98	1284	181.304
TRINITY_DN171913_c0_g2_i1	6611.77	2480	181.104	[Tigrfam]aIF-2: translation initiation factor aIF-2	K03243
TRINITY_DN171352_c10_g1_i3	1288.09	485	180.412
TRINITY_DN154354_c1_g4_i3	899.21	345	177.053	[Pfam]Tubulin C-terminal domain
TRINITY_DN166470_c0_g1_i1	4356.57	1678	176.366	[Pfam]DEAD/DEAH box helicase	K12614
TRINITY_DN160110_c0_g1_i6	1904.75	735	176.04
TRINITY_DN168812_c0_g1_i2	2221.01	862	175.027	[Pfam]Adenylate cyclase associated (CAP) C terminal
TRINITY_DN152888_c2_g5_i5	2068.47	806	174.331
TRINITY_DN168772_c1_g1_i1	7005.53	2733	174.126
TRINITY_DN166131_c1_g12_i1	1427.89	558	173.829
TRINITY_DN172073_c7_g5_i3	3166.06	1241	173.304	[Tigrfam]ATPase-IIC_X-K: Na,H/K antiporter P-type ATPase, alpha subunit
TRINITY_DN171661_c4_g5_i4	3033.99	1193	172.757	[Pfam]DEK C terminal domain
TRINITY_DN172097_c6_g4_i1	1807.57	711	172.698	[Pfam]TATA-binding protein interacting (TIP20)
TRINITY_DN150420_c1_g1_i2	1777.61	704	171.524
TRINITY_DN171993_c8_g8_i3	2589.64	1030	170.79	[Pfam]WD domain, G-beta repeat
TRINITY_DN171208_c4_g21_i2	3087.89	1234	169.984	[Pfam]EamA-like transporter family
TRINITY_DN170574_c0_g8_i3	2165.89	872	168.726	[Pfam]HEAT repeats
TRINITY_DN172038_c3_g2_i3	7037.46	2859	167.21	[Pfam]Mono-functional DNA-alkylating methyl methanesulfonate N-term	K12830
TRINITY_DN171846_c3_g8_i1	694.58	284	166.137
TRINITY_DN164964_c0_g17_i2	935.78	385	165.11
TRINITY_DN160023_c12_g17_i1	774.03	319	164.827
TRINITY_DN171968_c5_g3_i2	6652.23	2757	163.905	[Pfam]BRCA1 C Terminus (BRCT) domain
TRINITY_DN171527_c3_g2_i1	4999.15	2075	163.659	[Pfam]Vacuolar sorting protein 39 domain 2	K20183
TRINITY_DN167402_c0_g6_i7	1741.64	724	163.411
TRINITY_DN153142_c2_g4_i1	884.89	375	160.295	[Pfam]Tubulin C-terminal domain
TRINITY_DN161175_c0_g6_i3	688.89	293	159.714
TRINITY_DN171965_c3_g1_i4	4336.3	1849	159.31
TRINITY_DN156970_c2_g1_i1	1392.9	594	159.292
TRINITY_DN147682_c4_g16_i1	728.22	311	159.061	[Pfam]Tubulin C-terminal domain
TRINITY_DN167472_c1_g16_i2	1576.91	674	158.931
TRINITY_DN171307_c5_g6_i1	977.95	420	158.172	[Pfam]Tubulin/FtsZ family, GTPase domain
TRINITY_DN154367_c0_g3_i1	975.52	419	158.155
TRINITY_DN172131_c11_g1_i3	2942.51	1267	157.762
TRINITY_DN171979_c4_g12_i1	923.82	399	157.281
TRINITY_DN172065_c7_g1_i1	10123	4384	156.856	[Pfam]Coatomer WD associated region	K19671
TRINITY_DN171219_c17_g9_i7	987.74	432	155.317	[Pfam]Tubulin/FtsZ family, GTPase domain
TRINITY_DN171602_c8_g3_i2	817.81	359	154.746
TRINITY_DN171197_c6_g6_i1	1317.72	580	154.332	[Pfam]Hsp70 protein
TRINITY_DN166223_c0_g14_i1	1321.29	588	152.645	[Tigrfam]uS5_euk_arch: ribosomal protein uS5
TRINITY_DN169011_c1_g18_i3	1806.01	805	152.4
TRINITY_DN172075_c22_g6_i2	3748.96	1675	152.04	[Pfam]Endonuclease/Exonuclease/phosphatase family
TRINITY_DN169958_c1_g5_i6	1724.22	771	151.915
TRINITY_DN171880_c2_g8_i1	719.71	322	151.832
TRINITY_DN161169_c3_g16_i1	2057.59	926	150.942
TRINITY_DN147682_c4_g12_i1	582.57	263	150.471
TRINITY_DN154367_c0_g11_i1	728.75	329	150.468
TRINITY_DN171979_c4_g15_i1	687.82	311	150.237
TRINITY_DN154978_c1_g11_i3	900.73	409	149.6	[Pfam]EF-hand domain pair
TRINITY_DN147682_c4_g7_i1	736.03	335	149.249	[Pfam]Tubulin C-terminal domain
TRINITY_DN147713_c0_g1_i1	2159.49	987	148.626	[Pfam]EF-hand domain pair	K02183
TRINITY_DN171219_c17_g5_i8	1001.9	462	147.314	[Pfam]Tubulin C-terminal domain
TRINITY_DN167043_c1_g5_i1	1485.35	687	146.87
TRINITY_DN171423_c10_g8_i2	1111.19	518	145.72	[Pfam]EF-hand domain pair
TRINITY_DN165095_c0_g7_i1	1089.2	508	145.648
TRINITY_DN170448_c1_g4_i1	1384.83	647	145.396
TRINITY_DN160023_c12_g2_i17	606.21	285	144.491
TRINITY_DN152063_c1_g2_i1	736.83	349	143.418	[Pfam]Tubulin C-terminal domain
TRINITY_DN167024_c2_g11_i2	1543.3	731	143.415
TRINITY_DN165095_c0_g2_i1	904.01	429	143.145
TRINITY_DN171614_c3_g4_i1	2897.01	1383	142.295	[Tigrfam]2A060602: transmembrane receptor Patched
TRINITY_DN171502_c12_g6_i1	736.31	354	141.292	[Pfam]Tubulin/FtsZ family, GTPase domain
TRINITY_DN171966_c6_g5_i1	1663.48	803	140.722	[Pfam]HEAT repeat
TRINITY_DN169778_c2_g3_i1	4415.54	2133	140.622	[Pfam]Hsp70 protein	K03283
TRINITY_DN150762_c0_g1_i1	4045.55	1955	140.57	[Pfam]Tubulin/FtsZ family, GTPase domain	K07374
TRINITY_DN158757_c1_g21_i1	831.07	406	139.051	[Tigrfam]atpD: ATP synthase F1, beta subunit	K02112
TRINITY_DN169840_c3_g5_i1	4207.13	2058	138.868	[Pfam]WD domain, G-beta repeat
TRINITY_DN171489_c5_g16_i1	1444.6	715	137.247
TRINITY_DN172123_c7_g1_i10	1702.49	843	137.189
TRINITY_DN169956_c15_g1_i1	911.72	455	136.117
TRINITY_DN158750_c0_g3_i1	1477.88	741	135.482	[Pfam]Ribosomal L18 C-terminal region
TRINITY_DN171931_c5_g1_i2	2853.56	1453	133.408	[Pfam]Kinesin motor domain	K10406
TRINITY_DN171447_c4_g11_i2	3071.21	1565	133.308	[Pfam]TRAF-type zinc finger
TRINITY_DN172137_c13_g1_i4	1188.3	606	133.203
TRINITY_DN160563_c2_g6_i7	1108.22	566	133.006
TRINITY_DN147682_c4_g8_i1	561.85	287	132.984
TRINITY_DN167402_c0_g8_i2	896.39	459	132.662
TRINITY_DN153579_c2_g10_i1	599.46	307	132.643	[Pfam]Tubulin C-terminal domain
TRINITY_DN171390_c23_g10_i6	1404.1	722	132.106	[Pfam]Tubulin/FtsZ family, GTPase domain
TRINITY_DN171968_c5_g9_i2	1437.71	742	131.622	[Pfam]BRCA1 C Terminus (BRCT) domain
TRINITY_DN170104_c0_g4_i1	2197.64	1135	131.529	[Pfam]Protein kinase domain	K04345
TRINITY_DN140969_c1_g3_i1	766.32	397	131.124
TRINITY_DN157644_c1_g12_i1	511.42	265	131.097
TRINITY_DN159478_c2_g7_i7	797.79	415	130.588
TRINITY_DN170335_c5_g19_i1	505.47	266	129.085
TRINITY_DN160023_c12_g2_i15	931.48	495	127.829
TRINITY_DN171918_c9_g6_i5	2682.29	1429	127.507	[Tigrfam]2A0119: cation transport protein
TRINITY_DN156993_c1_g3_i3	1650.45	881	127.259
TRINITY_DN164836_c3_g1_i2	2520.89	1348	127.036	[Pfam]Serine hydroxymethyltransferase
TRINITY_DN157748_c2_g5_i2	1103.72	595	126.01	[Pfam]Glycosyltransferase family 18
TRINITY_DN171966_c6_g11_i2	869.86	470	125.722
TRINITY_DN171762_c1_g2_i2	2292.37	1239	125.683	[Tigrfam]P-ATPase-V: P-type ATPase of unknown pump specificity (type V)
TRINITY_DN169836_c1_g11_i1	1401.62	758	125.61	[Tigrfam]gcvT: glycine cleavage system T protein
TRINITY_DN171897_c8_g2_i4	5381.99	2943	124.226	[Pfam]HEAT repeats	K20222
TRINITY_DN149248_c1_g3_i1	533.53	292	124.119
TRINITY_DN171478_c1_g3_i1	1569.8	862	123.708	[Pfam]RmlD substrate binding domain
TRINITY_DN170335_c5_g10_i1	650.6	358	123.45
TRINITY_DN171966_c6_g23_i1	973.93	537	123.201
TRINITY_DN172011_c9_g3_i5	2032.65	1125	122.736	[Pfam]NAD(P) transhydrogenase beta subunit	K00325
TRINITY_DN169263_c1_g2_i3	2183.95	1211	122.507	[Tigrfam]FadB: fatty oxidation complex, alpha subunit FadB	K00022
TRINITY_DN172056_c5_g4_i2	2064.26	1147	122.254
TRINITY_DN154387_c1_g5_i1	854.9	476	122.003
TRINITY_DN160023_c12_g17_i2	444.62	248	121.786
TRINITY_DN171544_c6_g15_i2	878	491	121.472	[Pfam]Tubulin C-terminal domain
TRINITY_DN171519_c7_g15_i1	746.45	418	121.307
TRINITY_DN171336_c10_g26_i4	786.35	441	121.126	[Pfam]Mitochondrial carrier protein
TRINITY_DN171602_c8_g3_i4	506.47	285	120.718
TRINITY_DN169886_c9_g4_i2	773.99	436	120.59	[Pfam]ATP:guanido phosphotransferase, C-terminal catalytic domain
TRINITY_DN163840_c1_g8_i2	675.92	381	120.512
TRINITY_DN147682_c4_g6_i1	508.73	287	120.411
TRINITY_DN143992_c1_g3_i1	1511.5	860	119.391
TRINITY_DN143235_c0_g24_i2	387.68	221	119.163
TRINITY_DN166693_c1_g2_i1	1827.83	1042	119.16
TRINITY_DN157268_c1_g5_i1	487.61	278	119.149
TRINITY_DN170391_c1_g3_i2	1784.68	1022	118.624	[Tigrfam]menE: O-succinylbenzoate-CoA ligase
TRINITY_DN171124_c1_g2_i2	869.02	499	118.302
TRINITY_DN172061_c6_g3_i2	1279.95	735	118.295	[Pfam]Bacterial NAD-glutamate dehydrogenase
TRINITY_DN171975_c6_g11_i1	2816.37	1619	118.169	[Tigrfam]CDC48: AAA family ATPase, CDC48 subfamily
TRINITY_DN170450_c1_g13_i1	3152.83	1814	118.066
TRINITY_DN160620_c0_g8_i1	3164.03	1821	118.03	[Pfam]ShK domain-like
TRINITY_DN168341_c0_g8_i2	1375.11	796	117.351	[Pfam]Protein kinase domain
TRINITY_DN169423_c0_g1_i4	1140.84	662	117.065
TRINITY_DN172074_c6_g1_i1	2593.25	1506	116.972
TRINITY_DN171979_c4_g7_i2	645.32	376	116.587
TRINITY_DN172139_c10_g13_i11	1872.31	1092	116.471
TRINITY_DN171293_c2_g8_i2	2333.02	1361	116.445	[Pfam]PH domain
TRINITY_DN161766_c1_g1_i1	2476.94	1446	116.361
TRINITY_DN158212_c2_g1_i3	737.53	431	116.242
TRINITY_DN171846_c3_g12_i1	751.98	442	115.57
TRINITY_DN167082_c0_g8_i1	1745.39	1036	114.444	[Pfam]KR domain
TRINITY_DN170945_c1_g5_i1	2295.43	1368	113.983
TRINITY_DN171602_c8_g25_i1	569.43	340	113.769
TRINITY_DN159573_c2_g10_i2	781.47	467	113.673
TRINITY_DN172013_c1_g6_i3	4082.31	2441	113.606
TRINITY_DN171711_c4_g4_i5	3021.68	1819	112.844	[Pfam]Protein kinase domain	K07376
TRINITY_DN172123_c7_g1_i7	918.49	553	112.826
TRINITY_DN165095_c0_g11_i1	469.67	283	112.737
TRINITY_DN165858_c0_g1_i4	4503.87	2719	112.522	[Pfam]Hsp90 protein	K04079
TRINITY_DN171725_c0_g2_i1	7102.43	4288	112.516	[Pfam]CAP-Gly domain	K04648
TRINITY_DN166131_c1_g5_i2	780.1	471	112.51
TRINITY_DN164336_c0_g1_i2	3675.81	2222	112.375
TRINITY_DN156578_c1_g1_i1	593.53	359	112.308
TRINITY_DN171175_c10_g16_i1	888.93	540	111.824
TRINITY_DN171706_c1_g1_i1	1467.56	893	111.636	[Pfam]von Willebrand factor type A domain
TRINITY_DN172135_c12_g1_i3	9969.56	6070	111.57
TRINITY_DN171210_c9_g15_i6	566.15	345	111.474
TRINITY_DN158778_c2_g6_i10	1482.11	907	111.003	[Tigrfam]ATPase-IIC_X-K: Na,H/K antiporter P-type ATPase, alpha subunit	K01539
TRINITY_DN172137_c13_g13_i1	843.74	517	110.861
TRINITY_DN171975_c6_g2_i1	603.12	370	110.73
TRINITY_DN170421_c2_g2_i1	7746.17	4755	110.662	[Pfam]Patched family	K06225
TRINITY_DN169954_c3_g21_i4	1187.52	729	110.656	[Pfam]Tubulin C-terminal domain
TRINITY_DN166462_c0_g9_i1	503.02	309	110.583
TRINITY_DN172140_c18_g2_i1	3364.37	2071	110.353
TRINITY_DN170768_c0_g6_i6	1920.77	1184	110.201
TRINITY_DN151917_c1_g11_i1	670.96	414	110.093
TRINITY_DN149947_c0_g18_i1	904.16	558	110.071
TRINITY_DN143235_c0_g16_i2	449.67	278	109.878
TRINITY_DN165840_c0_g1_i1	3816.95	2362	109.774
TRINITY_DN171916_c7_g2_i2	3128.05	1938	109.643	[Tigrfam]ATPase-IIC_X-K: Na,H/K antiporter P-type ATPase, alpha subunit
TRINITY_DN168465_c1_g1_i7	1003.31	622	109.574	[Tigrfam]prok_dnaK: chaperone protein DnaK
TRINITY_DN158814_c0_g1_i1	2954.74	1835	109.382	[Pfam]Calreticulin family	K08054
TRINITY_DN163130_c0_g1_i1	3213.61	1998	109.259	[Pfam]WD domain, G-beta repeat	K10415
TRINITY_DN165022_c4_g2_i4	1098.54	684	109.099	[Pfam]Tubulin C-terminal domain
TRINITY_DN171307_c5_g16_i2	649.82	405	108.993	[Pfam]Tubulin C-terminal domain
TRINITY_DN165858_c0_g1_i3	4156.49	2594	108.847	[Pfam]Hsp90 protein	K04079
TRINITY_DN171836_c1_g12_i1	1513.7	945	108.81	[Pfam]AMP-binding enzyme
TRINITY_DN171757_c4_g1_i4	1181.69	738	108.77	[Pfam]Domain of unknown function (DUF2431)
TRINITY_DN156888_c0_g3_i1	2039.75	1283	107.997	[Pfam]ABC transporter
TRINITY_DN171948_c5_g4_i5	2530.98	1597	107.658
TRINITY_DN171458_c0_g7_i7	1961.07	1241	107.345	[Pfam]Inorganic H+ pyrophosphatase
TRINITY_DN164729_c0_g1_i2	1033.58	655	107.192	[Tigrfam]amt: ammonium transporter
TRINITY_DN171818_c2_g3_i5	1230.35	780	107.151
TRINITY_DN169707_c2_g3_i3	1181.7	750	107.03
TRINITY_DN172029_c4_g5_i3	1920.5	1223	106.672	[Pfam]Region in Clathrin and VPS	K04646
TRINITY_DN172074_c6_g4_i3	1259.38	803	106.538
TRINITY_DN169385_c4_g1_i3	1234.77	788	106.444	[Tigrfam]thrS: threonine--tRNA ligase	K01868
TRINITY_DN172043_c6_g2_i5	2222.75	1419	106.407	[Tigrfam]SMC_prok_B: chromosome segregation protein SMC
TRINITY_DN171606_c9_g24_i3	504.38	322	106.405	[Pfam]Actin
TRINITY_DN172123_c8_g5_i4	1063.02	679	106.349
TRINITY_DN148861_c1_g1_i1	2444	1562	106.287	[Pfam]HMG (high mobility group) box
TRINITY_DN161169_c3_g16_i4	1224.16	784	106.068
TRINITY_DN171038_c4_g3_i4	2457.75	1580	105.668	[Tigrfam]ATPase-IIB_Ca: calcium-translocating P-type ATPase, PMCA-type	K01537
TRINITY_DN156667_c0_g1_i2	2607.71	1681	105.379	[Pfam]DEAD/DEAH box helicase	K12812
TRINITY_DN170075_c0_g6_i3	1500.12	974	104.623	[Pfam]7 transmembrane sweet-taste receptor of 3 GCPR
TRINITY_DN172137_c13_g1_i7	857.55	557	104.584
TRINITY_DN165958_c1_g1_i9	2784.39	1810	104.499
TRINITY_DN172082_c2_g8_i1	2978.82	1953	103.61
TRINITY_DN154489_c1_g1_i2	1204.36	790	103.56
TRINITY_DN165532_c0_g1_i1	3246.82	2130	103.548
TRINITY_DN171789_c1_g3_i3	1051.34	691	103.354
TRINITY_DN171979_c2_g10_i2	904.9	595	103.311
TRINITY_DN172131_c10_g8_i2	1041.55	686	103.138
TRINITY_DN168651_c0_g1_i1	4619.24	3049	102.914
TRINITY_DN164663_c2_g3_i3	2883.28	1906	102.76	[Pfam]Malic enzyme, NAD binding domain	K00029
TRINITY_DN172136_c7_g4_i1	6118.67	4059	102.4
TRINITY_DN172068_c7_g4_i1	642.41	427	102.199
TRINITY_DN148851_c2_g1_i3	1655.84	1104	101.885	[Tigrfam]ATPase-IIC_X-K: Na,H/K antiporter P-type ATPase, alpha subunit
TRINITY_DN171979_c2_g10_i4	803.52	539	101.267
TRINITY_DN171979_c4_g7_i1	636.33	427	101.232
TRINITY_DN137752_c1_g6_i1	430.52	289	101.195
TRINITY_DN156993_c1_g3_i4	1153.26	775	101.085
TRINITY_DN163390_c1_g4_i3	1017.08	684	101.009
TRINITY_DN171502_c12_g9_i1	412.98	278	100.913
TRINITY_DN152655_c0_g2_i1	970.52	654	100.806	[Pfam]Hsp90 protein
TRINITY_DN169165_c4_g11_i1	1084.52	732	100.644
TRINITY_DN172040_c11_g9_i1	703.37	476	100.378	[Pfam]Hsp70 protein
TRINITY_DN169945_c0_g3_i3	1937.48	1313	100.238	[Pfam]Matrixin	K01388
TRINITY_DN171303_c4_g4_i5	3729.19	2528	100.207	[Pfam]Hsp90 protein	K09487
TRINITY_DN165858_c0_g1_i1	4218.02	2865	100.01	[Pfam]Hsp90 protein	K04079
TRINITY_DN162056_c0_g3_i4	917.9	624	99.9246	[Pfam]Type of WD40 repeat
TRINITY_DN172040_c11_g5_i2	2036.13	1386	99.7938	[Pfam]Hsp70 protein
TRINITY_DN161920_c0_g2_i2	1425.32	973	99.5087
TRINITY_DN171558_c3_g5_i2	2294.16	1569	99.3258	[Tigrfam]tktlase_bact: transketolase
TRINITY_DN171895_c2_g1_i1	5442.31	3728	99.1674
TRINITY_DN169683_c3_g7_i1	1475.12	1012	99.0167	[Pfam]Annexin
TRINITY_DN167024_c2_g24_i5	902.17	622	98.528
TRINITY_DN166338_c0_g3_i5	966.56	668	98.291
TRINITY_DN157607_c0_g1_i1	1941.01	1342	98.2509	[Pfam]WD domain, G-beta repeat	K04536
TRINITY_DN166004_c0_g1_i1	3843.66	2666	97.9369	[Pfam]HELP motif	K15420
TRINITY_DN153642_c1_g17_i1	614.94	427	97.8287	[Pfam]O-methyltransferase
TRINITY_DN161640_c5_g6_i2	414.42	288	97.7484
TRINITY_DN156214_c1_g10_i3	636.74	443	97.6382	[Pfam]Tubulin C-terminal domain
TRINITY_DN100910_c0_g1_i1	2076	1445	97.5935
TRINITY_DN168665_c1_g1_i3	1719.35	1197	97.5734
TRINITY_DN171472_c0_g5_i1	1239.82	864	97.4779	[Pfam]DNA polymerase family B
TRINITY_DN167402_c0_g8_i1	689.93	481	97.4364
TRINITY_DN170824_c4_g12_i2	995.82	695	97.3324
TRINITY_DN169963_c1_g4_i1	3319.07	2318	97.2668	[Pfam]Vacuolar protein 14 C-terminal Fig4p binding	K15305
TRINITY_DN171391_c3_g10_i7	1381.85	967	97.0724	[Pfam]Domain of unknown function (DUF4419)
TRINITY_DN170233_c1_g2_i1	793.7	557	96.7972
TRINITY_DN171934_c6_g4_i6	2215.72	1555	96.7934	[Pfam]Protein of unknown function (DUF4246)
TRINITY_DN168727_c1_g3_i2	1364.59	962	96.3582	[Pfam]Transmembrane amino acid transporter protein
TRINITY_DN171818_c2_g3_i3	835.23	589	96.3279
TRINITY_DN171210_c9_g11_i1	656.14	463	96.2669	[Pfam]Hsp90 protein
TRINITY_DN170999_c2_g6_i3	2535.22	1793	96.0499	[Pfam]FKBP-type peptidyl-prolyl cis-trans isomerase	K09571
TRINITY_DN171165_c0_g1_i1	2001.95	1422	95.6346
TRINITY_DN171931_c5_g1_i1	1542.7	1096	95.6164	[Pfam]Kinesin motor domain
TRINITY_DN171423_c10_g18_i2	637.27	453	95.5623
TRINITY_DN165736_c0_g2_i7	1253.61	892	95.4683
TRINITY_DN154354_c1_g7_i1	382.95	273	95.2886
TRINITY_DN160023_c12_g10_i1	319.8	228	95.2807
TRINITY_DN171606_c9_g24_i1	505.82	361	95.181	[Pfam]Actin
TRINITY_DN171210_c9_g2_i4	494.86	354	94.96	[Pfam]Hsp90 protein
TRINITY_DN158253_c1_g2_i1	890.04	637	94.9143	[Pfam]Tubulin C-terminal domain
TRINITY_DN169376_c3_g3_i2	1952.07	1399	94.7849
TRINITY_DN172040_c11_g8_i1	474.11	340	94.7244	[Tigrfam]prok_dnaK: chaperone protein DnaK
TRINITY_DN159510_c0_g1_i2	1903.93	1368	94.5423	[Pfam]Aminotransferase class-V
TRINITY_DN171880_c2_g1_i2	2800	2013	94.4878	[Pfam]Ubiquitin-conjugating enzyme
TRINITY_DN147918_c0_g2_i1	824.72	593	94.4742	[Tigrfam]ribP_PPkin: ribose-phosphate diphosphokinase
TRINITY_DN172056_c5_g3_i2	1053.91	758	94.4487	[Pfam]BRCA1 C Terminus (BRCT) domain
TRINITY_DN170698_c1_g9_i4	1873.43	1349	94.3381	[Pfam]Papain family cysteine protease	K01365
TRINITY_DN136149_c0_g1_i1	1721	1240	94.2802	[Tigrfam]MalateDH-SF1: malate dehydrogenase	K00025
TRINITY_DN172081_c3_g10_i1	707.39	510	94.2215	[Pfam]O-methyltransferase
TRINITY_DN171757_c4_g1_i3	940.78	679	94.1195	[Pfam]Domain of unknown function (DUF2431)
TRINITY_DN159650_c0_g2_i1	2548.63	1842	93.9893	[Pfam]Myo-inositol-1-phosphate synthase	K01858
TRINITY_DN153142_c2_g15_i1	390.04	282	93.9553
TRINITY_DN167557_c0_g2_i5	1718.55	1243	93.9188
TRINITY_DN145493_c1_g8_i9	508.72	368	93.9058	[Pfam]Tubulin C-terminal domain
TRINITY_DN172132_c3_g2_i1	8873.8	6425	93.8205
TRINITY_DN171872_c0_g2_i1	914.88	663	93.7372
TRINITY_DN171661_c4_g5_i2	1719.86	1247	93.6889	[Pfam]DEK C terminal domain
TRINITY_DN171919_c0_g1_i1	1381.91	1003	93.5923	[Pfam]Domain of unknown function (DUF2431)
TRINITY_DN171267_c1_g2_i1	5148.47	3739	93.5372
TRINITY_DN166714_c0_g1_i1	3034.72	2208	93.3643	[Pfam]Oligosaccharyl transferase STT3 subunit	K07151
TRINITY_DN164585_c0_g1_i2	3375.14	2456	93.3523	[Tigrfam]3a01204: pigment precursor permease
TRINITY_DN172068_c8_g11_i4	791.18	576	93.307
TRINITY_DN171603_c2_g1_i2	2728.58	1988	93.2356	[Pfam]7 transmembrane sweet-taste receptor of 3 GCPR
TRINITY_DN161245_c1_g1_i1	3346.05	2445	92.964	[Pfam]HELP motif	K18598
TRINITY_DN160023_c12_g11_i2	354.39	259	92.9487
TRINITY_DN168165_c0_g2_i4	1552.04	1136	92.8081	[Pfam]IBR domain, a half RING-finger domain
TRINITY_DN161470_c1_g1_i1	1889.65	1384	92.7485	[Pfam]Calpain family cysteine protease
TRINITY_DN157644_c1_g7_i2	492.31	361	92.6388
TRINITY_DN168972_c2_g2_i5	1514.87	1111	92.6238	[Pfam]Endonuclease/Exonuclease/phosphatase family
TRINITY_DN145438_c0_g2_i1	1031.61	757	92.5723	[Tigrfam]V-ATPase_V1_B: V-type ATPase, B subunit
TRINITY_DN171933_c6_g11_i1	1781.71	1308	92.5317	[Pfam]Eukaryotic DNA topoisomerase I, catalytic core
TRINITY_DN145467_c1_g4_i1	523.85	385	92.4289
TRINITY_DN167983_c0_g1_i1	1362.51	1002	92.3705	[Pfam]TRAF-type zinc finger	K09849
TRINITY_DN170450_c1_g10_i2	700.73	516	92.2492
TRINITY_DN167312_c0_g1_i3	3598.32	2650	92.2392	[Pfam]TRAF-type zinc finger	K09849
TRINITY_DN171619_c1_g1_i1	7746.22	5707	92.2027	[Pfam]Ion transport protein	K04843
TRINITY_DN171901_c4_g19_i2	673.65	497	92.0745	[Tigrfam]rpa1: replication factor-a protein 1 (rpa1)	K07466
TRINITY_DN171080_c1_g4_i1	1329.51	982	91.969	[Pfam]MCM2/3/5 family
TRINITY_DN153609_c2_g21_i2	342.37	253	91.9256
TRINITY_DN163162_c0_g2_i2	1261.93	933	91.8787	[Pfam]Peptidase M16 inactive domain
TRINITY_DN171279_c1_g5_i2	1549.6	1146	91.8537	[Pfam]Bacterial low temperature requirement A protein (LtrA)
TRINITY_DN163092_c1_g3_i15	810.73	600	91.7881	[Pfam]Hsp90 protein
TRINITY_DN171336_c10_g5_i2	561.97	416	91.7659
TRINITY_DN172103_c7_g2_i3	3454.07	2573	91.1912	[Pfam]SPRY domain
TRINITY_DN154390_c0_g2_i4	731.21	545	91.1396
TRINITY_DN159894_c0_g1_i4	1640.28	1223	91.1073	[Pfam]Hsp70 protein
TRINITY_DN171403_c12_g5_i1	630.05	470	91.0623	[Pfam]Papain family cysteine protease
TRINITY_DN161016_c0_g1_i1	1839.7	1374	90.954	[Pfam]DEAD/DEAH box helicase	K11927
TRINITY_DN171859_c5_g2_i4	1583.26	1183	90.9136	[Tigrfam]AMP_deaminase: AMP deaminase
TRINITY_DN160096_c0_g4_i2	1383.15	1039	90.4306
TRINITY_DN171846_c2_g12_i1	425.81	320	90.3914
TRINITY_DN171133_c3_g1_i2	674.64	507	90.3911	[Pfam]Papain family cysteine protease
TRINITY_DN171641_c4_g3_i4	1195.97	899	90.3695	[Pfam]Sulfatase
TRINITY_DN171304_c1_g4_i4	1424.36	1073	90.174
TRINITY_DN171722_c2_g1_i3	2168.28	1634	90.1415	[Pfam]CAP-Gly domain
TRINITY_DN153363_c5_g10_i1	1708.03	1290	89.943	[Tigrfam]EF-1_alpha: translation elongation factor EF-1, subunit alpha
TRINITY_DN166668_c0_g1_i5	3073.02	2321	89.9398	[Pfam]TNFR/NGFR cysteine-rich region
TRINITY_DN156615_c1_g2_i1	2112	1596	89.8923	[Pfam]Adenylate cyclase associated (CAP) N terminal	K17261
TRINITY_DN156485_c0_g12_i2	511.51	387	89.7852
TRINITY_DN166767_c0_g1_i2	1299.39	984	89.7028	[Tigrfam]RNase_Z: ribonuclease Z	K00784
TRINITY_DN168768_c0_g1_i2	2534.64	1920	89.6761	[Pfam]Alpha/beta hydrolase family
TRINITY_DN169181_c0_g1_i1	4356	3303	89.5861	[Pfam]Vacuolar protein sorting-associated protein 35
TRINITY_DN170698_c1_g9_i16	981.18	744	89.5854	[Pfam]Papain family cysteine protease
TRINITY_DN169423_c0_g1_i3	765.81	583	89.2306
TRINITY_DN171612_c5_g6_i2	826.42	630	89.109	[Pfam]Tubulin/FtsZ family, GTPase domain
TRINITY_DN170583_c0_g5_i2	2863.04	2184	89.0505	[Pfam]Sec23/Sec24 trunk domain	K14007
TRINITY_DN155812_c1_g1_i1	1568.54	1200	88.7924	[Pfam]'Cold-shock' DNA-binding domain
TRINITY_DN160103_c3_g11_i1	491.4	376	88.7787	[Pfam]Tubulin/FtsZ family, GTPase domain
TRINITY_DN171498_c5_g2_i1	605.56	465	88.4638	[Pfam]Hsp70 protein
TRINITY_DN170548_c5_g4_i6	1090.95	839	88.3292
TRINITY_DN168984_c1_g3_i2	1036.96	798	88.2715	[Pfam]Tubulin C-terminal domain
TRINITY_DN160941_c2_g1_i3	1723.1	1328	88.1402
TRINITY_DN161728_c0_g2_i1	1214.37	937	88.0386
TRINITY_DN156393_c1_g5_i1	597	461	87.9701
TRINITY_DN168254_c2_g7_i2	915.51	707	87.964	[Pfam]Adenylylsulphate kinase
TRINITY_DN171164_c0_g6_i2	1051.8	813	87.8828	[Tigrfam]pyruv_carbox: pyruvate carboxylase
TRINITY_DN146299_c0_g1_i2	945.15	732	87.7104	[Pfam]TRAF-type zinc finger
TRINITY_DN171328_c5_g3_i4	1703.19	1320	87.6497	[Pfam]Monomeric isocitrate dehydrogenase
TRINITY_DN171979_c4_g4_i3	500.28	388	87.5876
TRINITY_DN149685_c0_g6_i1	493.26	383	87.486
TRINITY_DN170369_c1_g2_i1	1245.01	967	87.4597	[Pfam]Ankyrin repeats (3 copies)
TRINITY_DN171711_c4_g4_i6	1678.23	1306	87.2911	[Pfam]Protein kinase domain	K04345
TRINITY_DN169655_c7_g14_i3	575.41	448	87.2491
TRINITY_DN168044_c0_g4_i1	1894.44	1476	87.1878	[Pfam]ATPase family associated with various cellular activities (AAA)	K08900
TRINITY_DN169844_c0_g1_i1	3547.61	2766	87.1255	[Pfam]Adaptin N terminal region	K12392
TRINITY_DN123642_c0_g1_i1	1623	1268	86.9482	[Tigrfam]GAPDH-I: glyceraldehyde-3-phosphate dehydrogenase, type I	K00134
TRINITY_DN167557_c0_g2_i7	925.15	724	86.8031
TRINITY_DN163242_c0_g6_i27	826.39	647	86.7645
TRINITY_DN167755_c0_g5_i1	1895.79	1485	86.7212	[Pfam]V-ATPase subunit H	K02144
TRINITY_DN155966_c0_g3_i1	1270	995	86.7046	[Pfam]V-type ATPase 116kDa subunit family
TRINITY_DN172060_c4_g4_i1	2877.64	2258	86.5713
TRINITY_DN172137_c13_g1_i3	700.84	550	86.5601
TRINITY_DN170115_c3_g1_i3	3241.39	2546	86.4837	[Pfam]Ubiquitin carboxyl-terminal hydrolase|[Pfam]Ubiquitin carboxyl-terminal hydrolase
TRINITY_DN172049_c8_g3_i1	3009.02	2366	86.3917	[Tigrfam]2a30: K-Cl cotransporter|[Tigrfam]2a30: K-Cl cotransporter
TRINITY_DN158339_c0_g5_i2	829.71	653	86.3127	[Pfam]PLAT/LH2 domain
TRINITY_DN171685_c6_g7_i5	626.42	494	86.1391
TRINITY_DN161518_c0_g1_i1	3068.03	2423	86.0137	[Pfam]HECT-domain (ubiquitin-transferase)	K10595
TRINITY_DN171622_c6_g9_i5	1218.8	963	85.9741
TRINITY_DN171234_c4_g5_i1	645.67	511	85.8324
TRINITY_DN170922_c4_g4_i6	1126.52	892	85.7898	[Pfam]Sulfatase
TRINITY_DN162109_c4_g3_i2	1516.46	1201	85.7728	[Pfam]Tubulin C-terminal domain
TRINITY_DN172131_c10_g7_i2	516.22	409	85.7379
TRINITY_DN169843_c1_g6_i3	1585.63	1258	85.6215		K20299
TRINITY_DN154367_c0_g6_i2	408.24	324	85.5918
TRINITY_DN153136_c0_g1_i1	3071.54	2438	85.5823	[Pfam]Hsp90 protein	K04079
TRINITY_DN168163_c1_g1_i1	1469.68	1167	85.5487	[Pfam]RNA recognition motif (a.k.a. RRM, RBD, or RNP domain)	K12898
TRINITY_DN163089_c0_g1_i2	1295.8	1030	85.4599	[Pfam]Protein of unknown function (DUF1295)
TRINITY_DN168665_c1_g12_i2	405.06	322	85.4525
TRINITY_DN170335_c5_g2_i1	480.15	382	85.3837
TRINITY_DN171650_c2_g2_i1	1089.38	867	85.3536
TRINITY_DN161084_c1_g4_i2	1108.08	883	85.2456	[Tigrfam]EF-1_alpha: translation elongation factor EF-1, subunit alpha
TRINITY_DN171818_c3_g1_i1	1127.37	900	85.0914
TRINITY_DN170486_c0_g3_i1	4079.76	3265	84.8815	[Pfam]Ubiquitin carboxyl-terminal hydrolase	K11835
TRINITY_DN172082_c2_g14_i3	827.14	663	84.7475
TRINITY_DN168578_c0_g6_i3	779.04	625	84.6723
TRINITY_DN158212_c2_g1_i1	759.87	610	84.6196	[Pfam]C-terminus of histone H2A	K11251
TRINITY_DN144803_c1_g1_i4	664.18	534	84.4901	[Tigrfam]prok_dnaK: chaperone protein DnaK
TRINITY_DN168709_c15_g10_i2	378.03	304	84.4723	[Pfam]Tubulin/FtsZ family, GTPase domain
TRINITY_DN166335_c0_g3_i5	709.51	572	84.2605	[Pfam]Proteasome activator pa28 beta subunit	K06698
TRINITY_DN167307_c1_g2_i1	1706.01	1376	84.2218	[Pfam]Pre-mRNA splicing factor PRP21 like protein
TRINITY_DN171789_c1_g3_i1	1214.51	982	84.0139	[Pfam]Piwi domain
TRINITY_DN171477_c5_g2_i4	584.88	473	83.9976	[Pfam]Tubulin C-terminal domain
TRINITY_DN166166_c0_g7_i1	328.65	266	83.9293
TRINITY_DN160023_c12_g2_i12	346.72	282	83.5201
TRINITY_DN169702_c1_g8_i7	844.56	689	83.267	[Pfam]ATP synthase
TRINITY_DN160566_c2_g4_i1	2993.14	2447	83.0911	[Pfam]Myo-inositol-1-phosphate synthase	K01858
TRINITY_DN169119_c0_g2_i7	1922.72	1572	83.0854	[Tigrfam]nuoF_fam: NADH oxidoreductase (quinone), F subunit	K00335
TRINITY_DN153462_c0_g1_i1	1275	1043	83.04	[Pfam]Alpha/beta hydrolase family
TRINITY_DN154897_c1_g2_i1	250.57	205	83.0303
TRINITY_DN171982_c4_g9_i1	2663.55	2183	82.8836	[Pfam]Ubiquitin carboxyl-terminal hydrolase	K11835
TRINITY_DN171641_c4_g14_i4	1269.25	1041	82.8243
TRINITY_DN172133_c33_g1_i3	5208.44	4274	82.7817
TRINITY_DN167353_c0_g3_i2	595.9	489	82.7801
TRINITY_DN169634_c1_g1_i2	722.29	593	82.7405
TRINITY_DN137752_c1_g4_i1	362.9	298	82.7241
TRINITY_DN169707_c2_g3_i2	811.09	667	82.6047
TRINITY_DN156993_c1_g4_i1	795.09	654	82.5848
TRINITY_DN154989_c3_g1_i4	1830.8	1506	82.5805
TRINITY_DN170335_c5_g8_i1	285.65	235	82.5711
TRINITY_DN171390_c23_g10_i4	546.46	450	82.4911	[Pfam]Tubulin C-terminal domain
TRINITY_DN155439_c0_g1_i1	1459.1	1202	82.4598	[Tigrfam]amt: ammonium transporter
TRINITY_DN168956_c0_g9_i7	732.54	604	82.3865	[Tigrfam]26Sp45: 26S proteasome subunit P45 family
TRINITY_DN139293_c0_g1_i2	858.68	709	82.271	[Pfam]Coatomer beta C-terminal region
TRINITY_DN170916_c1_g4_i1	1028.08	853	81.8727
TRINITY_DN168466_c0_g1_i4	2212.6	1836	81.8638	[Tigrfam]chap_CCT_eta: T-complex protein 1, eta subunit	K09499
TRINITY_DN154539_c0_g22_i1	332.28	276	81.7818
TRINITY_DN172002_c4_g2_i3	1591.62	1325	81.599	[Pfam]CRM1 C terminal	K14290
TRINITY_DN170302_c0_g13_i3	778.49	649	81.4835
TRINITY_DN154233_c0_g9_i3	1088.95	908	81.4673
TRINITY_DN171846_c3_g22_i1	398.87	333	81.3671
TRINITY_DN157644_c1_g3_i1	607.4	508	81.2218
TRINITY_DN155466_c2_g15_i3	407.32	341	81.1415
TRINITY_DN164884_c0_g1_i1	2438.83	2043	81.0914	[Pfam]Protein phosphatase 2A regulatory B subunit (B56 family)
TRINITY_DN171279_c0_g2_i1	779	653	81.0374
TRINITY_DN142715_c0_g1_i3	412.05	346	80.8975
TRINITY_DN153142_c2_g13_i1	278.27	234	80.7815

## Sheet: dino. parasite and others
Supplementary Table 3B. Top 300 genes with highest expression levels (calculated using TPM) from the "dinoflagellate parasite and others" pool.
While transcripts from the putative parasites should be in this pool, this pool could also include transcripts from the photosymbiont. Therefore, we would advise caution when drawing conclusions from this set of transcripts.
Transcript_ID	No. of transcripts	Transcript length	TPM (Transcript Per Million)	Annotation	KEGG KO
TRINITY_DN157031_c0_g2_i1	32360.6	348	5063.65
TRINITY_DN163064_c3_g11_i2	40813.7	555	4003.54
TRINITY_DN157031_c0_g4_i1	28315.1	401	3844.93	[Pfam]Bacterial DNA-binding protein
TRINITY_DN157031_c0_g2_i2	15730.2	346	2475.03
TRINITY_DN152079_c0_g3_i1	9596.8	302	1729.69
TRINITY_DN150314_c0_g1_i1	39523	1508	1426.62	[Pfam]Alpha/beta hydrolase family
TRINITY_DN152079_c0_g1_i2	5015.97	239	1142.55
TRINITY_DN154778_c2_g1_i1	12151.8	624	1060.67
TRINITY_DN150115_c4_g2_i19	6336.29	327	1054.46	[Pfam]Ubiquitin family	K02977
TRINITY_DN160945_c0_g4_i1	11084.4	616	979.774
TRINITY_DN166254_c3_g4_i8	9575.65	718	726.018	[Tigrfam]GAPDH-I: glyceraldehyde-3-phosphate dehydrogenase, type I
TRINITY_DN169347_c0_g8_i1	14513.2	1267	623.591
TRINITY_DN157411_c1_g1_i3	3656.1	368	540.644	[Pfam]Ubiquitin family
TRINITY_DN160945_c0_g17_i2	5156.51	570	492.512
TRINITY_DN164775_c0_g14_i1	2949.93	353	454.937
TRINITY_DN157031_c0_g4_i2	2606.72	340	417.403	[Pfam]Bacterial DNA-binding protein
TRINITY_DN169347_c0_g8_i8	3853.38	507	413.679	[Tigrfam]RNA_lig_RNL2: RNA ligase, Rnl2 family
TRINITY_DN167196_c2_g1_i2	8382.6	1112	410.508	[Tigrfam]NDP-sugDHase: nucleotide sugar dehydrogenase
TRINITY_DN163064_c3_g10_i1	1901.5	257	402.843
TRINITY_DN124440_c0_g2_i1	2847.56	390	397.533
TRINITY_DN164882_c5_g1_i5	8912.1	1254	386.969	[Tigrfam]cysta_beta: cystathionine beta-synthase	K01697
TRINITY_DN159259_c1_g1_i2	8781.94	1291	370.245	[Pfam]BTB/POZ domain
TRINITY_DN167196_c2_g1_i10	5834.95	861	368.847	[Tigrfam]NDP-sugDHase: nucleotide sugar dehydrogenase
TRINITY_DN169347_c0_g8_i7	2948.67	449	357.421
TRINITY_DN160282_c1_g6_i1	4478.33	688	354.317
TRINITY_DN48886_c0_g1_i1	5444	839	353.394
TRINITY_DN149317_c2_g7_i1	1993.29	312	347.815
TRINITY_DN163064_c3_g7_i1	3771.1	591	347.246
TRINITY_DN156436_c1_g1_i1	12420	1975	342.402	[Pfam]WD domain, G-beta repeat
TRINITY_DN171081_c0_g5_i1	11372.1	1846	335.415	[Pfam]Protein of unknown function (DUF1336)
TRINITY_DN172076_c9_g18_i2	5508.8	905	331.476	[Tigrfam]2a58: sodium-dependent inorganic phosphate (Pi) transporter
TRINITY_DN167196_c2_g1_i1	7122.59	1173	330.663	[Tigrfam]NDP-sugDHase: nucleotide sugar dehydrogenase
TRINITY_DN147190_c0_g1_i1	10911.4	1814	327.417	[Tigrfam]sulP: sulfate permease	K03321
TRINITY_DN39551_c0_g2_i1	1532.08	257	324.781
TRINITY_DN170244_c9_g15_i2	3227.03	560	313.727
TRINITY_DN153555_c3_g11_i1	1808.63	318	309.676
TRINITY_DN165819_c0_g2_i2	2389.81	429	303.355
TRINITY_DN165780_c1_g4_i3	8431.48	1609	285.179
TRINITY_DN155588_c3_g2_i2	4782.89	938	277.529
TRINITY_DN152079_c0_g10_i1	1379.85	277	270.959
TRINITY_DN170244_c9_g4_i1	1252.37	255	267.483
TRINITY_DN170962_c2_g7_i2	5955.31	1235	262.543	[Pfam]Hsp70 protein
TRINITY_DN160701_c0_g2_i1	2018.23	419	262.361
TRINITY_DN164775_c0_g3_i1	2304.19	515	243.58
TRINITY_DN172076_c9_g16_i2	2896.71	663	237.784	[Tigrfam]2a58: sodium-dependent inorganic phosphate (Pi) transporter
TRINITY_DN149317_c2_g17_i3	1395.29	320	237.318
TRINITY_DN166340_c5_g3_i2	5607.32	1347	226.713
TRINITY_DN160301_c0_g7_i1	1699.6	409	226.327
TRINITY_DN164432_c0_g7_i8	2868.86	693	225.391
TRINITY_DN152588_c0_g2_i1	4407.93	1068	224.73
TRINITY_DN164648_c1_g2_i4	3556.35	865	223.756
TRINITY_DN163204_c1_g1_i7	2676.68	679	214.693
TRINITY_DN153555_c1_g2_i1	1272.86	327	211.851
TRINITY_DN163355_c0_g5_i2	2372.7	615	210.089
TRINITY_DN160945_c0_g4_i3	1979.26	533	202.287
TRINITY_DN167196_c2_g1_i9	3591.42	981	199.336	[Tigrfam]NDP-sugDHase: nucleotide sugar dehydrogenase
TRINITY_DN149317_c2_g1_i2	1308.71	358	199.012
TRINITY_DN170935_c2_g1_i3	2149.39	588	198.927	[Tigrfam]NDP-sugDHase: nucleotide sugar dehydrogenase
TRINITY_DN96682_c0_g4_i1	5097.16	1401	198.146
TRINITY_DN39551_c0_g3_i1	1149.42	317	197.545
TRINITY_DN159798_c1_g3_i12	3599.57	1011	193.907
TRINITY_DN163852_c0_g3_i1	5541	1567	192.554	[Pfam]Domain of unknown function (DUF3472)
TRINITY_DN166173_c2_g3_i3	10125	2878	191.505	[Pfam]Hsp90 protein	K04079
TRINITY_DN164520_c1_g1_i2	5083.93	1452	190.602
TRINITY_DN155588_c3_g2_i3	3345.33	963	189.114
TRINITY_DN165046_c2_g1_i3	3715.38	1082	186.953	[Pfam]Phosphoglycerate kinase	K00927
TRINITY_DN130400_c4_g1_i6	1140.88	334	186.022
TRINITY_DN169832_c1_g19_i1	2528.88	741	185.782
TRINITY_DN165046_c2_g1_i4	3626.33	1070	184.515	[Pfam]Phosphoglycerate kinase	K00927
TRINITY_DN162400_c2_g3_i5	1894.93	565	182.549	[Pfam]Actin
TRINITY_DN163204_c1_g1_i6	2048.68	613	181.939
TRINITY_DN160945_c0_g4_i2	1599.54	482	180.826
TRINITY_DN154441_c0_g1_i1	5070.42	1529	180.559	[Pfam]MYND finger
TRINITY_DN163064_c3_g5_i1	1849.43	562	179.153
TRINITY_DN151901_c0_g1_i1	1134.43	347	178.026
TRINITY_DN169537_c0_g1_i1	6054.23	1872	176.066	[Pfam]Glycosyl hydrolase family 7
TRINITY_DN171437_c5_g15_i6	1554.52	487	173.85	[Pfam]S-adenosyl-L-homocysteine hydrolase
TRINITY_DN171081_c0_g7_i1	2289.81	720	173.201
TRINITY_DN160282_c1_g8_i3	1474.54	469	171.219
TRINITY_DN164648_c1_g2_i15	1887.1	619	165.94
TRINITY_DN148683_c15_g1_i2	2192.98	726	164.43	[Pfam]Chlorophyll A-B binding protein
TRINITY_DN119598_c0_g1_i1	4277.46	1432	162.588	[Tigrfam]rpsA: ribosomal protein bS1	K02945
TRINITY_DN166254_c3_g4_i7	1994.05	668	162.563	[Tigrfam]GAPDH-I: glyceraldehyde-3-phosphate dehydrogenase, type I	K00134
TRINITY_DN99032_c0_g1_i1	7351	2472	161.933
TRINITY_DN162456_c0_g4_i1	1828.49	616	161.691	[Pfam]ShK domain-like
TRINITY_DN171663_c2_g2_i2	4630.41	1565	161.097	[Pfam]WSC domain
TRINITY_DN155073_c0_g10_i1	777.9	264	160.448
TRINITY_DN157031_c0_g2_i3	917.79	312	160
TRINITY_DN163210_c3_g1_i2	5782.68	1978	159.137
TRINITY_DN168798_c1_g11_i1	2174.79	745	158.874		K00799
TRINITY_DN157593_c2_g1_i5	3485.74	1210	156.8
TRINITY_DN164520_c1_g1_i4	3267.49	1155	153.94
TRINITY_DN167196_c2_g1_i12	2401.59	866	150.872	[Tigrfam]NDP-sugDHase: nucleotide sugar dehydrogenase
TRINITY_DN171715_c6_g2_i6	8347.75	3032	149.824	[Pfam]Ion transport protein
TRINITY_DN170244_c9_g2_i2	1504.02	548	149.389
TRINITY_DN165780_c1_g7_i1	1045.33	387	147.014
TRINITY_DN160006_c0_g1_i1	3902.98	1453	146.244	[Pfam]Esterase PHB depolymerase
TRINITY_DN158917_c0_g4_i1	1929.04	721	145.614	[Pfam]ADP-ribosylation factor family
TRINITY_DN172076_c9_g20_i2	1610.47	603	145.381	[Tigrfam]2a58: sodium-dependent inorganic phosphate (Pi) transporter
TRINITY_DN158688_c1_g12_i1	882.97	331	145.258
TRINITY_DN170244_c9_g3_i1	933.15	350	145.22
TRINITY_DN155134_c0_g1_i1	3325.72	1258	143.986
TRINITY_DN170935_c2_g1_i4	1128.17	427	143.709	[Tigrfam]NDP-sugDHase: nucleotide sugar dehydrogenase
TRINITY_DN170935_c2_g1_i2	1540.83	588	142.695	[Tigrfam]NDP-sugDHase: nucleotide sugar dehydrogenase
TRINITY_DN163746_c2_g1_i3	2482.11	956	141.332	[Pfam]Tubulin C-terminal domain
TRINITY_DN159606_c3_g2_i8	811.52	313	141.092
TRINITY_DN155839_c0_g1_i1	5864.77	2263	141.058
TRINITY_DN146197_c0_g1_i1	2791.87	1110	136.913
TRINITY_DN171081_c0_g9_i1	1383.61	552	136.384
TRINITY_DN167306_c1_g9_i3	1654.88	667	135.097	[Tigrfam]EF-Tu: translation elongation factor Tu
TRINITY_DN169881_c0_g3_i3	4578.01	1854	134.399	[Tigrfam]sss: transporter, solute:sodium symporter (SSS) family
TRINITY_DN149337_c1_g2_i1	2217.23	904	133.548
TRINITY_DN146197_c1_g3_i1	2011.76	828	132.31	[Tigrfam]glycosyl_450act: glycosyltransferase, activator-dependent family
TRINITY_DN152079_c0_g6_i2	595.9	251	129.361
TRINITY_DN169347_c0_g4_i1	996.8	421	128.957
TRINITY_DN151131_c0_g2_i2	1620	685	128.816
TRINITY_DN198817_c0_g1_i1	6509	2761	128.315	[Tigrfam]D_ala_D_alaTIGR: D-alanine--D-alanine ligase	K01921
TRINITY_DN148055_c1_g13_i1	737.76	314	127.981
TRINITY_DN162400_c2_g3_i1	685.59	292	127.758
TRINITY_DN147627_c0_g1_i6	1891.22	806	127.717
TRINITY_DN153610_c1_g2_i1	2725.79	1163	127.551
TRINITY_DN168891_c0_g21_i2	707.11	302	127.377	[Pfam]Tubulin C-terminal domain
TRINITY_DN156194_c0_g2_i1	1790.24	769	126.843
TRINITY_DN164779_c1_g2_i3	1133.08	487	126.739
TRINITY_DN165819_c0_g6_i12	985.3	428	125.375
TRINITY_DN164060_c1_g7_i3	2228.71	971	124.897	[Pfam]Tubulin/FtsZ family, GTPase domain	K07374
TRINITY_DN163010_c0_g1_i3	3717.66	1622	124.825	[Pfam]Major Facilitator Superfamily
TRINITY_DN158688_c1_g4_i1	671.36	294	124.342
TRINITY_DN149317_c2_g18_i1	619.18	271	124.315
TRINITY_DN164648_c1_g2_i8	2256.89	991	123.973
TRINITY_DN160301_c0_g8_i3	1163.66	513	123.468	[Pfam]Actin
TRINITY_DN164775_c0_g17_i2	618.44	273	123.308
TRINITY_DN139382_c1_g1_i2	1573.65	696	123.156
TRINITY_DN164775_c0_g3_i2	874.24	388	122.774
TRINITY_DN163027_c0_g1_i1	4309.23	1916	122.395	[Pfam]Carboxylesterase family	K03929
TRINITY_DN170031_c0_g22_i1	527.78	236	122.017
TRINITY_DN163010_c0_g1_i1	4035.29	1815	121.035	[Pfam]Major Facilitator Superfamily
TRINITY_DN164683_c3_g4_i1	2004.84	917	118.997
TRINITY_DN126090_c0_g2_i1	1844.29	844	118.956	[Pfam]ATP synthase B/B' CF(0)
TRINITY_DN77778_c2_g2_i1	560.89	257	118.936
TRINITY_DN169537_c0_g1_i2	3937.67	1803	118.908	[Pfam]Glycosyl hydrolase family 7
TRINITY_DN143595_c4_g1_i4	3762.63	1727	118.605
TRINITY_DN89493_c0_g1_i1	2526	1161	118.526
TRINITY_DN170244_c9_g6_i1	719.06	331	118.345	[Pfam]WWE domain
TRINITY_DN171182_c0_g8_i2	1699.62	783	118.128
TRINITY_DN171024_c5_g1_i2	1481.2	683	118.05
TRINITY_DN85964_c0_g1_i1	618.51	285	117.957
TRINITY_DN159606_c3_g2_i12	1184.79	547	117.9
TRINITY_DN170244_c9_g2_i5	640.93	296	117.876
TRINITY_DN146620_c0_g1_i1	2221.48	1029	117.542	[Pfam]Tubulin/FtsZ family, GTPase domain
TRINITY_DN168891_c0_g1_i1	787.69	366	117.208	[Pfam]Tubulin/FtsZ family, GTPase domain
TRINITY_DN167196_c2_g4_i4	803.48	373	117.15	[Pfam]UDP-glucose/GDP-mannose dehydrogenase family, NAD binding domain
TRINITY_DN169347_c0_g2_i1	572.3	266	116.99
TRINITY_DN168482_c0_g1_i2	3956.05	1880	114.588	[Pfam]Isochorismatase family
TRINITY_DN164434_c0_g2_i1	1386.77	671	112.483
TRINITY_DN171081_c0_g8_i2	1421.36	689	112.249
TRINITY_DN153555_c3_g5_i1	596.32	289	112.119
TRINITY_DN170244_c9_g3_i2	757.96	369	111.904
TRINITY_DN153555_c2_g1_i3	2446.4	1202	110.844
TRINITY_DN143844_c0_g3_i3	879.17	433	110.464
TRINITY_DN159562_c0_g1_i2	2574.51	1270	110.374	[Pfam]NeuB family
TRINITY_DN201464_c0_g1_i1	2973	1477	109.569
TRINITY_DN171070_c8_g1_i2	1186.94	590	109.51
TRINITY_DN160945_c0_g6_i1	873.81	435	109.308
TRINITY_DN166254_c3_g4_i13	1598.7	796	109.266	[Tigrfam]GAPDH-I: glyceraldehyde-3-phosphate dehydrogenase, type I
TRINITY_DN189422_c0_g1_i1	3744	1866	109.222	[Pfam]LCCL domain
TRINITY_DN170244_c9_g15_i3	652.95	330	107.839
TRINITY_DN165722_c1_g8_i3	1438.14	727	107.668
TRINITY_DN138772_c0_g1_i1	2210.38	1118	107.664	[Pfam]Aldo/keto reductase family
TRINITY_DN170244_c9_g2_i4	734.33	372	107.397
TRINITY_DN116618_c0_g1_i1	2311	1171	107.341	[Tigrfam]amt: ammonium transporter
TRINITY_DN167193_c1_g4_i1	1349.37	687	106.97
TRINITY_DN164368_c0_g1_i1	2870.82	1461	106.967
TRINITY_DN168891_c0_g13_i2	598.88	305	106.843	[Pfam]Tubulin/FtsZ family, GTPase domain
TRINITY_DN160873_c1_g2_i1	5023.53	2572	106.306	[Pfam]Calcium-dependent channel, 7TM region, putative phosphate
TRINITY_DN161450_c3_g6_i3	1754.76	906	105.46
TRINITY_DN161300_c0_g1_i1	2018	1043	105.341	[Pfam]Tubulin/FtsZ family, GTPase domain	K07374
TRINITY_DN147011_c1_g1_i1	3411	1768	105.008	[Pfam]Sperm-tail PG-rich repeat
TRINITY_DN169638_c5_g5_i1	1701.66	883	104.924	[Pfam]Chlorophyll A-B binding protein
TRINITY_DN173025_c0_g1_i1	2338	1214	104.872
TRINITY_DN166866_c0_g10_i2	2650.16	1391	103.697	[Pfam]PPR repeat family
TRINITY_DN160945_c0_g11_i2	607.72	320	103.38
TRINITY_DN165819_c0_g6_i2	857.3	454	102.826
TRINITY_DN163639_c2_g1_i1	2328.86	1233	102.812
TRINITY_DN169100_c2_g5_i1	865.05	459	102.643
TRINITY_DN169602_c2_g6_i2	3297.8	1750	102.599
TRINITY_DN157411_c1_g1_i2	721.94	384	102.196	[Pfam]Ubiquitin family
TRINITY_DN167729_c1_g3_i2	1567.93	850	100.564
TRINITY_DN165776_c0_g3_i3	1897.96	1038	99.5087
TRINITY_DN171829_c6_g9_i2	1930.38	1056	99.5035	[Pfam]Ribonucleotide reductase, small chain
TRINITY_DN155202_c3_g2_i1	466.12	255	99.4519
TRINITY_DN163600_c0_g1_i3	1516.54	834	99.0531
TRINITY_DN162400_c2_g3_i3	838.3	463	98.5072	[Pfam]Actin
TRINITY_DN163600_c0_g1_i2	1455.07	805	98.3784
TRINITY_DN167317_c0_g4_i3	1450.29	807	97.8484
TRINITY_DN164384_c0_g1_i1	2650.56	1476	97.7791	[Pfam]Alpha/beta hydrolase family
TRINITY_DN159707_c10_g1_i2	2911.49	1622	97.6993
TRINITY_DN164423_c6_g8_i6	2593.29	1450	97.3874	[Tigrfam]prok_dnaK: chaperone protein DnaK	K03283
TRINITY_DN160957_c0_g1_i1	2652.76	1485	97.2812	[Pfam]Ring finger domain
TRINITY_DN140951_c0_g6_i1	557.21	312	97.2064	[Pfam]Tubulin/FtsZ family, GTPase domain
TRINITY_DN164648_c1_g2_i18	931.4	524	96.8704
TRINITY_DN172012_c6_g2_i1	5566.14	3131	96.7465	[Pfam]TPR repeat	K09571
TRINITY_DN162456_c0_g2_i2	751	425	96.1752
TRINITY_DN170709_c1_g7_i4	1188.39	675	95.8487
TRINITY_DN129205_c1_g1_i2	1387.94	789	95.7357
TRINITY_DN160333_c0_g1_i3	3032.64	1748	94.4667	[Pfam]Protein tyrosine kinase
TRINITY_DN124738_c0_g1_i2	514.73	297	94.3498
TRINITY_DN144718_c0_g3_i1	1011.88	588	93.6273
TRINITY_DN160794_c1_g2_i1	3036	1769	93.398	[Pfam]Radial spoke protein 3
TRINITY_DN146658_c2_g1_i5	2189.82	1277	93.393
TRINITY_DN157221_c2_g1_i4	1683.92	984	93.2183	[Pfam]Protein of unknown function (DUF667)
TRINITY_DN167982_c2_g1_i16	1749.96	1023	93.1484	[Pfam]OST-HTH Associated domain
TRINITY_DN171475_c5_g12_i3	1809.21	1059	93.0083
TRINITY_DN150115_c4_g11_i1	684.23	401	92.9262
TRINITY_DN170244_c9_g3_i3	454.14	266	92.8755
TRINITY_DN112595_c0_g1_i1	1085	637	92.7563	[Pfam]Domain of unknown function (DUF202)
TRINITY_DN171475_c5_g12_i4	2029.84	1199	92.1695
TRINITY_DN164779_c1_g2_i4	599.45	357	91.4382
TRINITY_DN144718_c0_g3_i3	927.68	553	91.2883
TRINITY_DN167729_c1_g4_i4	916.21	547	91.2051	[Pfam]WWE domain
TRINITY_DN162394_c0_g3_i1	2182.08	1304	91.0878	[Pfam]Response regulator receiver domain
TRINITY_DN164992_c1_g5_i4	781.07	467	91.0544
TRINITY_DN160301_c0_g11_i1	477.43	286	90.9794
TRINITY_DN200787_c0_g1_i1	2318	1393	90.58
TRINITY_DN150115_c4_g5_i2	690.92	422	89.1856
TRINITY_DN165821_c1_g8_i1	1966.63	1202	89.0816
TRINITY_DN163954_c2_g2_i6	1307.59	805	88.3823	[Pfam]Glycosyl hydrolase family 7
TRINITY_DN167729_c1_g3_i3	898.09	557	87.7839
TRINITY_DN162511_c0_g7_i2	1824.21	1133	87.639
TRINITY_DN171254_c2_g15_i3	1411.03	879	87.372
TRINITY_DN167317_c0_g4_i2	1276.44	796	87.2539
TRINITY_DN162688_c3_g1_i2	2261.48	1415	87.0319
TRINITY_DN138635_c2_g2_i1	3559	2232	86.8107	[Pfam]POT family
TRINITY_DN121478_c0_g1_i1	2221	1393	86.7889	[Pfam]Zinc finger C-x8-C-x5-C-x3-H type (and similar)
TRINITY_DN163064_c3_g3_i1	405.37	256	86.2908
TRINITY_DN154281_c4_g1_i2	1321.95	834	86.2874	[Pfam]Cobalamin synthesis protein cobW C-terminal domain
TRINITY_DN171081_c0_g5_i2	1688.76	1067	86.0673	[Pfam]Protein of unknown function (DUF1336)
TRINITY_DN152588_c0_g4_i1	1228.96	777	86.0564	[Pfam]GCC2 and GCC3
TRINITY_DN66053_c0_g1_i1	1806	1148	85.6809	[Pfam]Autophagy protein Apg6
TRINITY_DN126242_c0_g1_i2	2251.18	1432	85.5997
TRINITY_DN160378_c0_g2_i3	2805.03	1789	85.3338	[Tigrfam]metK: methionine adenosyltransferase	K00789
TRINITY_DN165074_c2_g3_i6	1219.18	780	85.0807	[Pfam]DEAD/DEAH box helicase
TRINITY_DN151868_c1_g1_i1	2938.23	1884	84.8881
TRINITY_DN171829_c6_g9_i7	1856.25	1191	84.8743	[Pfam]Ribonucleotide reductase, small chain
TRINITY_DN172015_c6_g2_i4	2144.64	1377	84.7905
TRINITY_DN162661_c2_g10_i1	496.22	320	84.3836
TRINITY_DN168754_c0_g1_i8	2110.6	1363	84.257
TRINITY_DN167317_c0_g4_i5	1210.87	783	84.2208
TRINITY_DN169857_c0_g4_i1	819.2	530	84.0797
TRINITY_DN162661_c2_g8_i1	1803.36	1171	83.8167	[Tigrfam]GAPDH-I: glyceraldehyde-3-phosphate dehydrogenase, type I
TRINITY_DN199293_c0_g1_i1	3211	2088	83.6974	[Pfam]PIF1-like helicase	K15255
TRINITY_DN199365_c0_g1_i1	1931	1260	83.4426	[Pfam]Putative papain-like cysteine peptidase (DUF1796)
TRINITY_DN144486_c0_g1_i1	2483.94	1622	83.3622
TRINITY_DN158688_c1_g6_i1	477.11	312	83.3306
TRINITY_DN164432_c0_g2_i2	756.48	494	83.3262
TRINITY_DN168277_c0_g6_i5	1616.55	1057	83.249
TRINITY_DN166340_c5_g5_i1	1996	1309	83.0132
TRINITY_DN140830_c0_g2_i2	610.41	401	82.9723
TRINITY_DN164779_c1_g6_i1	934.4	614	82.8581	[Tigrfam]flav_long: flavodoxin
TRINITY_DN169564_c0_g8_i2	1847.13	1216	82.7575
TRINITY_DN143129_c2_g1_i1	1042	689	82.3277
TRINITY_DN172015_c6_g2_i6	2186.08	1457	81.7167
TRINITY_DN178427_c0_g1_i1	2962.64	1976	81.5784
TRINITY_DN146658_c2_g1_i4	2315.02	1545	81.4765
TRINITY_DN167189_c3_g3_i1	1005.98	675	81.1852
TRINITY_DN210163_c0_g1_i1	2133	1435	80.9032	[Pfam]Triose-phosphate Transporter family
TRINITY_DN20004_c0_g1_i1	2713.63	1828	80.8325
TRINITY_DN164384_c0_g1_i2	2124.32	1436	80.5749	[Pfam]Alpha/beta hydrolase family
TRINITY_DN170247_c1_g7_i6	2047.48	1390	80.1963
TRINITY_DN155509_c7_g3_i3	851	578	80.0954	[Pfam]ATP synthase subunit C	K02110
TRINITY_DN160339_c0_g1_i1	1939	1319	80.0812	[Pfam]SPFH domain / Band 7 family
TRINITY_DN158604_c4_g1_i5	1110.59	755	80.0287
TRINITY_DN171881_c8_g12_i1	1890.35	1292	79.6357
TRINITY_DN161351_c2_g1_i1	2375.08	1626	79.5501	[Pfam]Protein phosphatase 2C
TRINITY_DN157411_c1_g1_i1	560.16	384	79.3655	[Pfam]Ubiquitin family
TRINITY_DN171663_c2_g2_i3	706.57	485	79.3159
TRINITY_DN79519_c0_g1_i1	2208.46	1523	78.9322
TRINITY_DN168891_c0_g18_i2	449.12	310	78.808	[Pfam]Tubulin/FtsZ family, GTPase domain
TRINITY_DN16849_c0_g1_i2	1376.09	952	78.6767	[Pfam]Mitochondrial carrier protein
TRINITY_DN152697_c1_g5_i1	523.89	363	78.5581
TRINITY_DN139626_c0_g1_i1	2504	1737	78.5022	[Tigrfam]ccl1: cyclin ccl1	K06634
TRINITY_DN160945_c0_g9_i1	485.95	338	78.3399
TRINITY_DN153427_c1_g2_i2	2600.51	1812	78.1456	[Pfam]Aminotransferase class-III
TRINITY_DN147486_c3_g4_i1	696.16	485	78.0849
TRINITY_DN171822_c1_g21_i5	1029.16	719	77.9806	[Pfam]OST-HTH Associated domain
TRINITY_DN105384_c0_g1_i1	2677	1870	77.8824
TRINITY_DN152079_c0_g6_i1	369.65	259	77.6432
TRINITY_DN108416_c0_g2_i1	2260	1586	77.6218
TRINITY_DN146848_c0_g1_i1	2063	1448	77.6122
TRINITY_DN171070_c8_g27_i1	537.28	378	77.3427
TRINITY_DN210857_c0_g1_i1	3666	2583	77.2697
TRINITY_DN164648_c1_g2_i10	1033	729	77.0873
TRINITY_DN171663_c1_g7_i1	1042.37	736	77.026
TRINITY_DN142591_c0_g3_i1	440.04	312	76.753
TRINITY_DN151834_c3_g2_i2	2008.4	1434	76.2625
TRINITY_DN157078_c0_g1_i1	3235	2312	76.162
TRINITY_DN1970_c1_g1_i1	1500	1081	75.5444
TRINITY_DN39646_c0_g1_i1	2186	1580	75.3033
TRINITY_DN163724_c0_g2_i3	1296.94	942	74.8918
